# Supplementary material for: The Conserved Tyr176/Leu177 Motif in the α-Helix 9 of the Feline Immunodeficiency Virus Capsid Protein Is Critical for Gag Particle Assembly
Source: PubMed Central journal article supplement (PMC6783973; doi:10.3390/v11090816), 2019-09-04
Supplement: viruses-11-00816-s001.pdf [file viruses-11-00816-s001.pdf]

## Supplementary Materials

**Figure S1.** Alignment of the amino acid sequence of FIV-14 CA helix 9 with non-redundant FIV Gag and CA protein sequences database (complete and partial sequences) using the BLASTP program (protein-protein BLAST; <https://blast.ncbi.nlm.nih.gov/Blast.cgi>). The query sequence corresponds to residues 171-185 of the FIV-14 CA protein. The GenBank accession number of each sequence included in the alignment is indicated in blue. Dots denote identical amino acids.

|                             |     |                 |     |
|-----------------------------|-----|-----------------|-----|
| Query (CA H9)               | 1   | AEVKLYLKQSLSIAN | 15  |
| <a href="#">ABU49231.1</a>  | 306 | .....           | 320 |
| <a href="#">P16087.1</a>    | 306 | .....           | 320 |
| <a href="#">AAK27724.1</a>  | 306 | .....           | 320 |
| <a href="#">Q05313.1</a>    | 306 | .....           | 320 |
| <a href="#">CAA40317.1</a>  | 306 | .....           | 320 |
| <a href="#">ABD16377.1</a>  | 306 | .....           | 320 |
| <a href="#">P19027.1</a>    | 306 | .....           | 320 |
| <a href="#">NP_040972.1</a> | 306 | .....           | 320 |
| <a href="#">ACX47905.1</a>  | 306 | .....           | 320 |
| <a href="#">AAU12277.1</a>  | 306 | .....           | 320 |
| <a href="#">AAB09309.1</a>  | 306 | .....           | 320 |
| <a href="#">P31821.1</a>    | 306 | .....           | 320 |
| <a href="#">CAC24813.1</a>  | 306 | .....           | 320 |
| <a href="#">CAC24816.1</a>  | 306 | .....           | 320 |
| <a href="#">ABV49614.1</a>  | 306 | .....           | 320 |
| <a href="#">CAC24814.1</a>  | 306 | .....           | 320 |
| <a href="#">AAT99669.1</a>  | 306 | .....           | 320 |
| <a href="#">ABD16370.1</a>  | 306 | .....           | 320 |
| <a href="#">AWA45279.1</a>  | 306 | .....           | 320 |
| <a href="#">ASU11154.1</a>  | 306 | .....           | 320 |
| <a href="#">ABD16375.1</a>  | 306 | .....           | 320 |
| <a href="#">ACV53570.1</a>  | 306 | .....           | 320 |
| <a href="#">ABD16372.1</a>  | 306 | .....           | 320 |
| <a href="#">ABD16371.1</a>  | 306 | .....           | 320 |
| <a href="#">ABD16376.1</a>  | 306 | .....           | 320 |
| <a href="#">BAA07064.1</a>  | 222 | .....           | 236 |
| <a href="#">BAA07069.1</a>  | 222 | .....           | 236 |
| <a href="#">BAA07065.1</a>  | 222 | .....           | 236 |
| <a href="#">BAA07066.1</a>  | 222 | .....           | 236 |
| <a href="#">BAA07068.1</a>  | 222 | .....           | 236 |
| <a href="#">AJD38750.1</a>  | 195 | .....           | 209 |
| <a href="#">AJD38747.1</a>  | 195 | .....           | 209 |
| <a href="#">AJD38746.1</a>  | 195 | .....           | 209 |
| <a href="#">QBA31038.1</a>  | 206 | .....           | 220 |
| <a href="#">QBA31018.1</a>  | 206 | .....           | 220 |
| <a href="#">QBA31035.1</a>  | 206 | .....           | 220 |
| <a href="#">QBA31033.1</a>  | 206 | .....           | 220 |

|                                   |     |       |     |
|-----------------------------------|-----|-------|-----|
| <a href="#"><u>QBA31030.1</u></a> | 206 | ..... | 220 |
| <a href="#"><u>QBA31031.1</u></a> | 206 | ..... | 220 |
| <a href="#"><u>AAN52128.1</u></a> | 171 | ..... | 185 |
| <a href="#"><u>AAN52131.1</u></a> | 173 | ..... | 187 |
| <a href="#"><u>AAN52127.1</u></a> | 170 | ..... | 184 |
| <a href="#"><u>AAN52130.1</u></a> | 163 | ..... | 177 |
| <a href="#"><u>AAN52132.1</u></a> | 165 | ..... | 179 |
| <a href="#"><u>CAA74181.1</u></a> | 171 | ..... | 185 |
| <a href="#"><u>CAA74180.1</u></a> | 171 | ..... | 185 |
| <a href="#"><u>AQX36296.1</u></a> | 164 | ..... | 178 |
| <a href="#"><u>AQX36285.1</u></a> | 164 | ..... | 178 |
| <a href="#"><u>AQX36293.1</u></a> | 164 | ..... | 178 |
| <a href="#"><u>AQX36303.1</u></a> | 164 | ..... | 178 |
| <a href="#"><u>AQX36291.1</u></a> | 164 | ..... | 178 |
| <a href="#"><u>AQX36304.1</u></a> | 164 | ..... | 178 |
| <a href="#"><u>AQX36301.1</u></a> | 164 | ..... | 178 |
| <a href="#"><u>QCL09064.1</u></a> | 157 | ..... | 171 |
| <a href="#"><u>AAN31706.1</u></a> | 155 | ..... | 169 |
| <a href="#"><u>ACT85909.1</u></a> | 155 | ..... | 169 |
| <a href="#"><u>AAN31686.1</u></a> | 155 | ..... | 169 |
| <a href="#"><u>AAN31703.1</u></a> | 155 | ..... | 169 |
| <a href="#"><u>AAN31705.1</u></a> | 155 | ..... | 169 |
| <a href="#"><u>ACT85893.1</u></a> | 155 | ..... | 169 |
| <a href="#"><u>ACT85906.1</u></a> | 155 | ..... | 169 |
| <a href="#"><u>AAN31712.1</u></a> | 155 | ..... | 169 |
| <a href="#"><u>AAN31695.1</u></a> | 155 | ..... | 169 |
| <a href="#"><u>ACT85882.1</u></a> | 155 | ..... | 169 |
| <a href="#"><u>ACT85905.1</u></a> | 155 | ..... | 169 |
| <a href="#"><u>ACT85920.1</u></a> | 155 | ..... | 169 |
| <a href="#"><u>ACT85877.1</u></a> | 155 | ..... | 169 |
| <a href="#"><u>AAN31685.1</u></a> | 155 | ..... | 169 |
| <a href="#"><u>AAN31690.1</u></a> | 155 | ..... | 169 |
| <a href="#"><u>ACT85878.1</u></a> | 155 | ..... | 169 |
| <a href="#"><u>AAN31693.1</u></a> | 155 | ..... | 169 |
| <a href="#"><u>ACT85892.1</u></a> | 155 | ..... | 169 |
| <a href="#"><u>AEK32459.1</u></a> | 155 | ..... | 169 |
| <a href="#"><u>ACT85870.1</u></a> | 155 | ..... | 169 |
| <a href="#"><u>ACT85898.1</u></a> | 155 | ..... | 169 |
| <a href="#"><u>AAN31708.1</u></a> | 155 | ..... | 169 |
| <a href="#"><u>ACT85874.1</u></a> | 155 | ..... | 169 |
| <a href="#"><u>ACT85913.1</u></a> | 155 | ..... | 169 |
| <a href="#"><u>ACT85876.1</u></a> | 155 | ..... | 169 |
| <a href="#"><u>ACT85871.1</u></a> | 155 | ..... | 169 |
| <a href="#"><u>AAN31696.1</u></a> | 155 | ..... | 169 |
| <a href="#"><u>AAN31684.1</u></a> | 155 | ..... | 169 |
| <a href="#"><u>ANN44238.1</u></a> | 154 | ..... | 168 |
| <a href="#"><u>ANN44244.1</u></a> | 154 | ..... | 168 |
| <a href="#"><u>ANN44245.1</u></a> | 154 | ..... | 168 |
| <a href="#"><u>ANN44239.1</u></a> | 154 | ..... | 168 |

|                            |     |                |     |
|----------------------------|-----|----------------|-----|
| <a href="#">ANN44246.1</a> | 154 | .....          | 168 |
| <a href="#">ANN44242.1</a> | 154 | .....          | 168 |
| <a href="#">ANN44237.1</a> | 154 | .....          | 168 |
| <a href="#">ABX25834.1</a> | 327 | .....          | 340 |
| <a href="#">CAA48157.1</a> | 306 | .....N...      | 320 |
| <a href="#">BAA07067.1</a> | 223 | .....          | 236 |
| <a href="#">AJD38745.1</a> | 196 | .....          | 209 |
| <a href="#">BAA07070.1</a> | 222 | .....H.....    | 236 |
| <a href="#">ABD16373.1</a> | 306 | .....M...      | 320 |
| <a href="#">ACV53568.1</a> | 306 | .....M...      | 320 |
| <a href="#">AJD38749.1</a> | 195 | .....M...      | 209 |
| <a href="#">AJD38748.1</a> | 195 | .....M...      | 209 |
| <a href="#">AAN31709.1</a> | 155 | .....M...      | 169 |
| <a href="#">ACT85902.1</a> | 155 | .....M...      | 169 |
| <a href="#">ANN44241.1</a> | 154 | .....M...      | 168 |
| <a href="#">ACV53569.1</a> | 306 | .K.....        | 320 |
| <a href="#">ABD48752.1</a> | 141 | .....          | 153 |
| <a href="#">ABD48758.1</a> | 141 | .....          | 153 |
| <a href="#">ABD48754.1</a> | 141 | .....          | 153 |
| <a href="#">ABD48759.1</a> | 141 | .....          | 153 |
| <a href="#">ABD48768.1</a> | 141 | .....          | 153 |
| <a href="#">ABD48753.1</a> | 141 | .....          | 153 |
| <a href="#">ABD48769.1</a> | 141 | .....          | 153 |
| <a href="#">ABD48773.1</a> | 141 | .....          | 153 |
| <a href="#">ABD48765.1</a> | 141 | .....          | 153 |
| <a href="#">ABD48757.1</a> | 141 | .....          | 153 |
| <a href="#">ABD48756.1</a> | 141 | .....          | 153 |
| <a href="#">ABX25829.1</a> | 331 | .....L...      | 344 |
| <a href="#">ABO16618.1</a> | 331 | .....L...      | 344 |
| <a href="#">ACY25087.1</a> | 306 | ....I.....M... | 320 |
| <a href="#">ACT85930.1</a> | 155 | ....I.....L... | 169 |
| <a href="#">AEK32460.1</a> | 155 | ....I.....M... | 169 |
| <a href="#">ACT85923.1</a> | 155 | ....V.....M... | 169 |
| <a href="#">ABO16619.1</a> | 318 | ..R.....T...   | 331 |
| <a href="#">ABD48763.1</a> | 141 | .....          | 152 |
| <a href="#">AAB49922.1</a> | 327 | ...I.....L...  | 340 |
| <a href="#">AAT12493.1</a> | 306 | ....T.....L... | 320 |
| <a href="#">AAM13443.1</a> | 306 | ....T.....L... | 320 |
| <a href="#">ABD48767.1</a> | 141 | .....Q.....    | 153 |
| <a href="#">AHZ63255.1</a> | 307 | ..RD.....S...  | 320 |
| <a href="#">AHZ63251.1</a> | 307 | ..RD.....S...  | 320 |
| <a href="#">AHZ63263.1</a> | 307 | ..RD.....S...  | 320 |
| <a href="#">AHZ63328.1</a> | 307 | ..RD.....S...  | 320 |
| <a href="#">AHZ63324.1</a> | 307 | ..RD.....S...  | 320 |
| <a href="#">AHZ63259.1</a> | 307 | ..RD.....S...  | 320 |
| <a href="#">AHZ63275.1</a> | 307 | ..RD.....S...  | 320 |
| <a href="#">AHZ63320.1</a> | 307 | ..RD.....S...  | 320 |
| <a href="#">AHZ63235.1</a> | 307 | ..RD.....S...  | 320 |
| <a href="#">AHZ63307.1</a> | 307 | ..RD.....S...  | 320 |

|                                       |     |                |     |
|---------------------------------------|-----|----------------|-----|
| <a href="#"><u>AHZ63227.1</u></a>     | 307 | ..RD.....S.    | 320 |
| <a href="#"><u>AHZ63239.1</u></a>     | 307 | ..RD.....S.    | 320 |
| <a href="#"><u>AHZ63247.1</u></a>     | 307 | ..RD.....S.    | 320 |
| <a href="#"><u>AHZ63231.1</u></a>     | 307 | ..RD.....S.    | 320 |
| <a href="#"><u>AHZ63334.1</u></a>     | 307 | ..RD.....S.    | 320 |
| <a href="#"><u>AHZ63271.1</u></a>     | 307 | ..RD.....S.    | 320 |
| <a href="#"><u>AHZ63267.1</u></a>     | 307 | ..RD.....S.    | 320 |
| <a href="#"><u>AHZ63336.1</u></a>     | 307 | ..RD.....S.    | 320 |
| <a href="#"><u>AHZ63340.1</u></a>     | 307 | ..RD.....S.    | 320 |
| <a href="#"><u>YP 009507790.1</u></a> | 307 | ..RD.....S.    | 320 |
| <a href="#"><u>AHZ63283.1</u></a>     | 307 | ..RD.....S.    | 320 |
| <a href="#"><u>AHZ63287.1</u></a>     | 307 | ..RD.....S.    | 320 |
| <a href="#"><u>AHZ63295.1</u></a>     | 307 | ..RD.....S.    | 320 |
| <a href="#"><u>AHZ63291.1</u></a>     | 307 | ..RD.....S.    | 320 |
| <a href="#"><u>AHZ63243.1</u></a>     | 307 | ..RD.....S.    | 320 |
| <a href="#"><u>AHZ63299.1</u></a>     | 307 | ..RD.....S.    | 320 |
| <a href="#"><u>AHZ63303.1</u></a>     | 307 | ..RD.....S.    | 320 |
| <a href="#"><u>AHZ63279.1</u></a>     | 307 | ..RD.....S.    | 320 |
| <a href="#"><u>ABO16611.1</u></a>     | 306 | D..Q...D....S. | 319 |
| <a href="#"><u>ABO16612.1</u></a>     | 306 | D..Q...D....S. | 319 |
| <a href="#"><u>ABO16605.1</u></a>     | 306 | D..Q...D....S. | 319 |
| <a href="#"><u>ABO16616.1</u></a>     | 306 | D..Q...D....S. | 319 |
| <a href="#"><u>AHZ63399.1</u></a>     | 306 | D..Q...D....S. | 319 |
| <a href="#"><u>ABO16614.1</u></a>     | 306 | D..Q...D....S. | 319 |
| <a href="#"><u>ABO16613.1</u></a>     | 306 | D..Q...D....S. | 319 |
| <a href="#"><u>AHZ63424.1</u></a>     | 306 | D..Q...D....S. | 319 |
| <a href="#"><u>ABO16606.1</u></a>     | 306 | D..Q...D....S. | 319 |
| <a href="#"><u>ABO16604.1</u></a>     | 306 | D..Q...D....S. | 319 |
| <a href="#"><u>ABO16615.1</u></a>     | 306 | D..Q...D....S. | 319 |
| <a href="#"><u>ABO16610.1</u></a>     | 306 | D..Q...D....S. | 319 |
| <a href="#"><u>ABO16607.1</u></a>     | 306 | D..Q...D....S. | 319 |
| <a href="#"><u>ABB29306.1</u></a>     | 306 | D..Q...D....S. | 319 |
| <a href="#"><u>AHZ63359.1</u></a>     | 306 | D..Q...D....S. | 319 |
| <a href="#"><u>AHZ63369.1</u></a>     | 306 | D..Q...D....S. | 319 |
| <a href="#"><u>AHZ63389.1</u></a>     | 306 | D..Q...D....S. | 319 |
| <a href="#"><u>AHZ63394.1</u></a>     | 306 | D..Q...D....S. | 319 |
| <a href="#"><u>AHZ63429.1</u></a>     | 306 | D..Q...D....S. | 319 |
| <a href="#"><u>AHZ63354.1</u></a>     | 306 | D..Q...D....S. | 319 |
| <a href="#"><u>AHZ63404.1</u></a>     | 306 | D..Q...D....S. | 319 |
| <a href="#"><u>AHZ63344.1</u></a>     | 306 | D..Q...D....S. | 319 |
| <a href="#"><u>AHZ63434.1</u></a>     | 306 | D..Q...D....S. | 319 |
| <a href="#"><u>ABO16608.1</u></a>     | 306 | D..Q...D....S. | 319 |
| <a href="#"><u>AHZ63349.1</u></a>     | 306 | D..Q...D....S. | 319 |
| <a href="#"><u>AHZ63409.1</u></a>     | 306 | D..Q...D....S. | 319 |
| <a href="#"><u>AHZ63364.1</u></a>     | 306 | D..Q...D....S. | 319 |
| <a href="#"><u>AHZ63419.1</u></a>     | 306 | D..Q...D....S. | 319 |
| <a href="#"><u>AHZ63379.1</u></a>     | 306 | D..Q...D....S. | 319 |
| <a href="#"><u>ABO16609.1</u></a>     | 306 | D..Q...D....S. | 319 |

**Figure S2.** Alignment of the amino acid sequence of FIV-14 CA helix 9 with non-redundant translated FIV *gag* and CA nucleotide sequences database (complete and partial sequences) using the TBLASTN program (protein-translated nucleotide sequences; <https://blast.ncbi.nlm.nih.gov/Blast.cgi>). The query sequence corresponds to residues 171-185 of the FIV-14 CA protein. The GenBank accession number of each sequence included in the alignment is indicated in blue. Dots denote identical amino acids.

|                            |      |                 |      |
|----------------------------|------|-----------------|------|
| Query (CA H9) 1            |      | AEVKLYLKQSLSIAN | 15   |
| <a href="#">DQ365596.1</a> | 916  | .....           | 960  |
| <a href="#">MF370550.1</a> | 1168 | .....           | 1212 |
| <a href="#">U11820.1</a>   | 1549 | .....           | 1593 |
| <a href="#">EU130945.1</a> | 916  | .....           | 960  |
| <a href="#">MH325062.1</a> | 616  | .....           | 660  |
| <a href="#">MH325057.1</a> | 616  | .....           | 660  |
| <a href="#">AJ304962.1</a> | 936  | .....           | 980  |
| <a href="#">M59418.1</a>   | 1549 | .....           | 1593 |
| <a href="#">DQ365589.1</a> | 916  | .....           | 960  |
| <a href="#">L06136.1</a>   | 916  | .....           | 960  |
| <a href="#">DQ365595.1</a> | 916  | .....           | 960  |
| <a href="#">M36968.1</a>   | 1543 | .....           | 1587 |
| <a href="#">AJ304959.1</a> | 936  | .....           | 980  |
| <a href="#">DQ365594.1</a> | 916  | .....           | 960  |
| <a href="#">AJ304960.1</a> | 936  | .....           | 980  |
| <a href="#">DQ365591.1</a> | 916  | .....           | 960  |
| <a href="#">GQ406242.1</a> | 916  | .....           | 960  |
| <a href="#">AY679785.1</a> | 916  | .....           | 960  |
| <a href="#">GQ422127.1</a> | 916  | .....           | 960  |
| <a href="#">AY684181.1</a> | 916  | .....           | 960  |
| <a href="#">AY139111.1</a> | 493  | .....           | 537  |
| <a href="#">M25381.1</a>   | 1543 | .....           | 1587 |
| <a href="#">AF361320.1</a> | 916  | .....           | 960  |
| <a href="#">X57002.1</a>   | 1548 | .....           | 1592 |
| <a href="#">MF352016.1</a> | 1582 | .....           | 1626 |
| <a href="#">AJ304961.1</a> | 936  | .....           | 980  |
| <a href="#">DQ365590.1</a> | 916  | .....           | 960  |
| <a href="#">AY139109.1</a> | 519  | .....           | 563  |
| <a href="#">AY139110.1</a> | 494  | .....           | 538  |
| <a href="#">MK018168.1</a> | 470  | .....           | 514  |
| <a href="#">MK018167.1</a> | 470  | .....           | 514  |
| <a href="#">MK018166.1</a> | 470  | .....           | 514  |
| <a href="#">MK018165.1</a> | 470  | .....           | 514  |
| <a href="#">MK018164.1</a> | 470  | .....           | 514  |
| <a href="#">D37819.1</a>   | 664  | .....           | 708  |
| <a href="#">EU025246.1</a> | 916  | .....           | 960  |
| <a href="#">AY139107.1</a> | 509  | .....           | 553  |
| <a href="#">AY139105.1</a> | 509  | .....           | 553  |

|                   |      |       |      |
|-------------------|------|-------|------|
| <u>MH325068.1</u> | 616  | ..... | 660  |
| <u>MH325071.1</u> | 616  | ..... | 660  |
| <u>EU117992.1</u> | 1681 | ..... | 1722 |
| <u>D37823.1</u>   | 664  | ..... | 708  |
| <u>MH325064.1</u> | 616  | ..... | 660  |
| <u>KM880118.1</u> | 583  | ..... | 627  |
| <u>KY629391.1</u> | 490  | ..... | 534  |
| <u>KT984669.1</u> | 460  | ..... | 504  |
| <u>MH325066.1</u> | 616  | ..... | 660  |
| <u>MH325070.1</u> | 616  | ..... | 660  |
| <u>MH325069.1</u> | 616  | ..... | 660  |
| <u>MH325067.1</u> | 616  | ..... | 660  |
| <u>MH325065.1</u> | 616  | ..... | 660  |
| <u>MH325061.1</u> | 616  | ..... | 660  |
| <u>MH325056.1</u> | 616  | ..... | 660  |
| <u>MH325055.1</u> | 616  | ..... | 660  |
| <u>MH325054.1</u> | 616  | ..... | 660  |
| <u>MH325052.1</u> | 616  | ..... | 660  |
| <u>MH325051.1</u> | 616  | ..... | 660  |
| <u>AY139112.1</u> | 504  | ..... | 548  |
| <u>MH325063.1</u> | 616  | ..... | 660  |
| <u>AY139106.1</u> | 513  | ..... | 557  |
| <u>KY629401.1</u> | 490  | ..... | 534  |
| <u>D37820.1</u>   | 664  | ..... | 708  |
| <u>D37818.1</u>   | 664  | ..... | 708  |
| <u>KM880121.1</u> | 583  | ..... | 627  |
| <u>Y13866.1</u>   | 511  | ..... | 555  |
| <u>D37822.1</u>   | 664  | ..... | 708  |
| <u>KM880117.1</u> | 583  | ..... | 627  |
| <u>KY629397.1</u> | 490  | ..... | 534  |
| <u>KY629396.1</u> | 490  | ..... | 534  |
| <u>KY629393.1</u> | 490  | ..... | 534  |
| <u>KY629388.1</u> | 490  | ..... | 534  |
| <u>KY629385.1</u> | 490  | ..... | 534  |
| <u>KY629384.1</u> | 490  | ..... | 534  |
| <u>KY629383.1</u> | 490  | ..... | 534  |
| <u>AY139108.1</u> | 488  | ..... | 532  |
| <u>Y13867.1</u>   | 511  | ..... | 555  |
| <u>KY629389.1</u> | 490  | ..... | 534  |
| <u>KT984671.1</u> | 460  | ..... | 504  |
| <u>KT984670.1</u> | 460  | ..... | 504  |
| <u>KT984667.1</u> | 460  | ..... | 504  |
| <u>KT984666.1</u> | 460  | ..... | 504  |
| <u>KT984664.1</u> | 460  | ..... | 504  |
| <u>KT984662.1</u> | 460  | ..... | 504  |
| <u>KY629400.1</u> | 490  | ..... | 534  |
| <u>KY629399.1</u> | 490  | ..... | 534  |
| <u>GQ339864.1</u> | 463  | ..... | 507  |
| <u>GQ339837.1</u> | 463  | ..... | 507  |

|                   |     |           |     |
|-------------------|-----|-----------|-----|
| <u>GQ339806.1</u> | 463 | .....     | 507 |
| <u>AY196330.1</u> | 463 | .....     | 507 |
| <u>AF531066.1</u> | 463 | .....     | 507 |
| <u>AF531065.1</u> | 463 | .....     | 507 |
| <u>AF531064.1</u> | 463 | .....     | 507 |
| <u>AF531063.1</u> | 463 | .....     | 507 |
| <u>AF531062.1</u> | 463 | .....     | 507 |
| <u>AF531061.1</u> | 463 | .....     | 507 |
| <u>AF531058.1</u> | 463 | .....     | 507 |
| <u>AF531056.1</u> | 463 | .....     | 507 |
| <u>AF531053.1</u> | 463 | .....     | 507 |
| <u>AF531052.1</u> | 463 | .....     | 507 |
| <u>AF531051.1</u> | 463 | .....     | 507 |
| <u>AF531048.1</u> | 463 | .....     | 507 |
| <u>X68019.1</u>   | 916 | .....N... | 960 |
| <u>KT984668.1</u> | 460 | .....     | 504 |
| <u>GQ339857.1</u> | 463 | .....     | 507 |
| <u>AF531049.1</u> | 463 | .....     | 507 |
| <u>AF531050.1</u> | 463 | .....     | 507 |
| <u>KY629402.1</u> | 490 | .....     | 534 |
| <u>KY629394.1</u> | 490 | .....     | 534 |
| <u>AF531057.1</u> | 463 | .....     | 507 |
| <u>GQ339830.1</u> | 463 | .....     | 507 |
| <u>GQ339813.1</u> | 463 | .....     | 507 |
| <u>AF531076.1</u> | 463 | .....     | 507 |
| <u>GQ422126.1</u> | 916 | .K.....   | 960 |
| <u>DQ365592.1</u> | 916 | .....M..  | 960 |
| <u>KT984663.1</u> | 460 | .....     | 504 |
| <u>KT984661.1</u> | 460 | .....     | 504 |
| <u>GQ422125.1</u> | 916 | .....M..  | 960 |
| <u>AF531060.1</u> | 463 | .....     | 507 |
| <u>AF531059.1</u> | 463 | .....     | 507 |
| <u>AF531055.1</u> | 463 | .....     | 507 |
| <u>AF531054.1</u> | 463 | .....     | 507 |
| <u>GQ339856.1</u> | 463 | .....     | 507 |
| <u>AF531072.1</u> | 463 | .....     | 507 |
| <u>GQ339862.1</u> | 463 | .....     | 507 |
| <u>GQ339819.1</u> | 463 | .....     | 507 |
| <u>GQ339850.1</u> | 463 | .....     | 507 |
| <u>GQ339842.1</u> | 463 | .....     | 507 |
| <u>GQ339815.1</u> | 463 | .....     | 507 |
| <u>AF531070.1</u> | 463 | .....     | 507 |
| <u>GQ339835.1</u> | 463 | .....     | 507 |
| <u>GQ339871.1</u> | 463 | .....     | 507 |
| <u>GQ339861.1</u> | 463 | .....     | 507 |
| <u>GQ339858.1</u> | 463 | .....     | 507 |
| <u>GQ339853.1</u> | 463 | .....     | 507 |
| <u>GQ339846.1</u> | 463 | .....     | 507 |
| <u>GQ339844.1</u> | 463 | .....     | 507 |

|                   |     |               |      |
|-------------------|-----|---------------|------|
| <u>GQ339832.1</u> | 463 | .....         | 507  |
| <u>GQ339831.1</u> | 463 | .....         | 507  |
| <u>GQ339829.1</u> | 463 | .....         | 507  |
| <u>GQ339826.1</u> | 463 | .....         | 507  |
| <u>GQ339817.1</u> | 463 | .....         | 507  |
| <u>GQ339812.1</u> | 463 | .....         | 507  |
| <u>GQ339808.1</u> | 463 | .....         | 507  |
| <u>AF531068.1</u> | 463 | .....         | 507  |
| <u>AF531067.1</u> | 463 | .....         | 507  |
| <u>D37821.1</u>   | 667 | .....         | 708  |
| <u>GU055218.1</u> | 916 | ....I.....M.. | 960  |
| <u>GQ339870.1</u> | 463 | .....         | 507  |
| <u>GQ339868.1</u> | 463 | .....         | 507  |
| <u>GQ339866.1</u> | 463 | .....         | 507  |
| <u>GQ339865.1</u> | 463 | .....         | 507  |
| <u>GQ339863.1</u> | 463 | .....         | 507  |
| <u>GQ339859.1</u> | 463 | .....         | 507  |
| <u>GQ339855.1</u> | 463 | .....         | 507  |
| <u>GQ339849.1</u> | 463 | .....         | 507  |
| <u>GQ339848.1</u> | 463 | .....         | 507  |
| <u>GQ339847.1</u> | 463 | .....         | 507  |
| <u>GQ339845.1</u> | 463 | .....         | 507  |
| <u>GQ339841.1</u> | 463 | .....         | 507  |
| <u>GQ339840.1</u> | 463 | .....         | 507  |
| <u>GQ339838.1</u> | 463 | .....         | 507  |
| <u>GQ339836.1</u> | 463 | .....         | 507  |
| <u>GQ339834.1</u> | 463 | .....         | 507  |
| <u>GQ339833.1</u> | 463 | .....         | 507  |
| <u>GQ339828.1</u> | 463 | .....         | 507  |
| <u>GQ339827.1</u> | 463 | .....         | 507  |
| <u>GQ339825.1</u> | 463 | .....         | 507  |
| <u>GQ339823.1</u> | 463 | .....         | 507  |
| <u>GQ339821.1</u> | 463 | .....         | 507  |
| <u>GQ339820.1</u> | 463 | .....         | 507  |
| <u>GQ339810.1</u> | 463 | .....         | 507  |
| <u>GQ339809.1</u> | 463 | .....         | 507  |
| <u>AF531075.1</u> | 463 | .....         | 507  |
| <u>AF531071.1</u> | 463 | .....         | 507  |
| <u>AF531069.1</u> | 463 | .....         | 507  |
| <u>GQ339807.1</u> | 463 | .....         | 507  |
| <u>JF411740.1</u> | 463 | .....         | 507  |
| <u>GQ339814.1</u> | 463 | .....         | 507  |
| <u>EF106736.1</u> | 991 | .....L..      | 1032 |
| <u>GQ339854.1</u> | 463 | .....         | 507  |
| <u>GQ339852.1</u> | 463 | .....         | 507  |
| <u>GQ339816.1</u> | 463 | .....         | 507  |
| <u>GQ339811.1</u> | 463 | .....         | 507  |
| <u>D37824.1</u>   | 664 | .....H.....   | 708  |
| <u>KT984665.1</u> | 460 | .....M..      | 504  |



|                            |      |               |      |
|----------------------------|------|---------------|------|
| <a href="#">KM880116.1</a> | 586  | .....         | 627  |
| <a href="#">EU117991.1</a> | 1695 | .....L..      | 1736 |
| <a href="#">KM880119.1</a> | 583  | .....M..      | 627  |
| <a href="#">KM880120.1</a> | 583  | .....M..      | 627  |
| <a href="#">GQ339843.1</a> | 463  | .....         | 507  |
| <a href="#">AF474246.1</a> | 1549 | ....T.....L.. | 1593 |
| <a href="#">AY600517.1</a> | 1548 | ....T.....L.. | 1592 |
| <a href="#">AF531074.1</a> | 463  | .....M..      | 507  |
| <a href="#">AF531073.1</a> | 463  | .....M..      | 507  |
| <a href="#">GQ339839.1</a> | 463  | .....M..      | 507  |
| <a href="#">AY713445.1</a> | 1663 | ...I.....L..  | 1704 |
| <a href="#">U56928.1</a>   | 1657 | ...I.....L..  | 1698 |
| <a href="#">GQ339867.1</a> | 463  | ....I.....L.. | 507  |
| <a href="#">EF106737.1</a> | 952  | ..R.....T.    | 993  |
| <a href="#">JF411741.1</a> | 463  | ....I.....M.. | 507  |
| <a href="#">GQ339860.1</a> | 463  | ....V.....M.. | 507  |
| <a href="#">DQ407174.1</a> | 421  | .....         | 459  |
| <a href="#">DQ407189.1</a> | 421  | .....         | 459  |
| <a href="#">DQ407181.1</a> | 421  | .....         | 459  |
| <a href="#">DQ407184.1</a> | 421  | .....         | 459  |
| <a href="#">DQ407173.1</a> | 421  | .....         | 459  |
| <a href="#">DQ407172.1</a> | 421  | .....         | 459  |
| <a href="#">DQ407169.1</a> | 421  | .....         | 459  |
| <a href="#">DQ407188.1</a> | 421  | .....         | 459  |
| <a href="#">DQ407187.1</a> | 421  | .....         | 459  |
| <a href="#">DQ407186.1</a> | 421  | .....         | 459  |
| <a href="#">DQ407182.1</a> | 421  | .....         | 459  |
| <a href="#">DQ407180.1</a> | 421  | .....         | 459  |
| <a href="#">DQ407176.1</a> | 421  | .....         | 459  |
| <a href="#">DQ407171.1</a> | 421  | .....         | 459  |
| <a href="#">DQ407168.1</a> | 421  | .....         | 459  |
| <a href="#">DQ407175.1</a> | 421  | .....         | 459  |
| <a href="#">DQ407185.1</a> | 421  | .....         | 459  |
| <a href="#">DQ407170.1</a> | 421  | .....         | 459  |
| <a href="#">DQ407190.1</a> | 421  | .....L        | 459  |
| <a href="#">DQ407179.1</a> | 421  | .....L        | 459  |
